# Supplementary material
Source: PubMed Central journal article supplement (PMC5551967)
Supplement: NIHMS73125-supplement-Supplementary_information.pdf [file NIHMS73125-supplement-Supplementary_information.pdf]

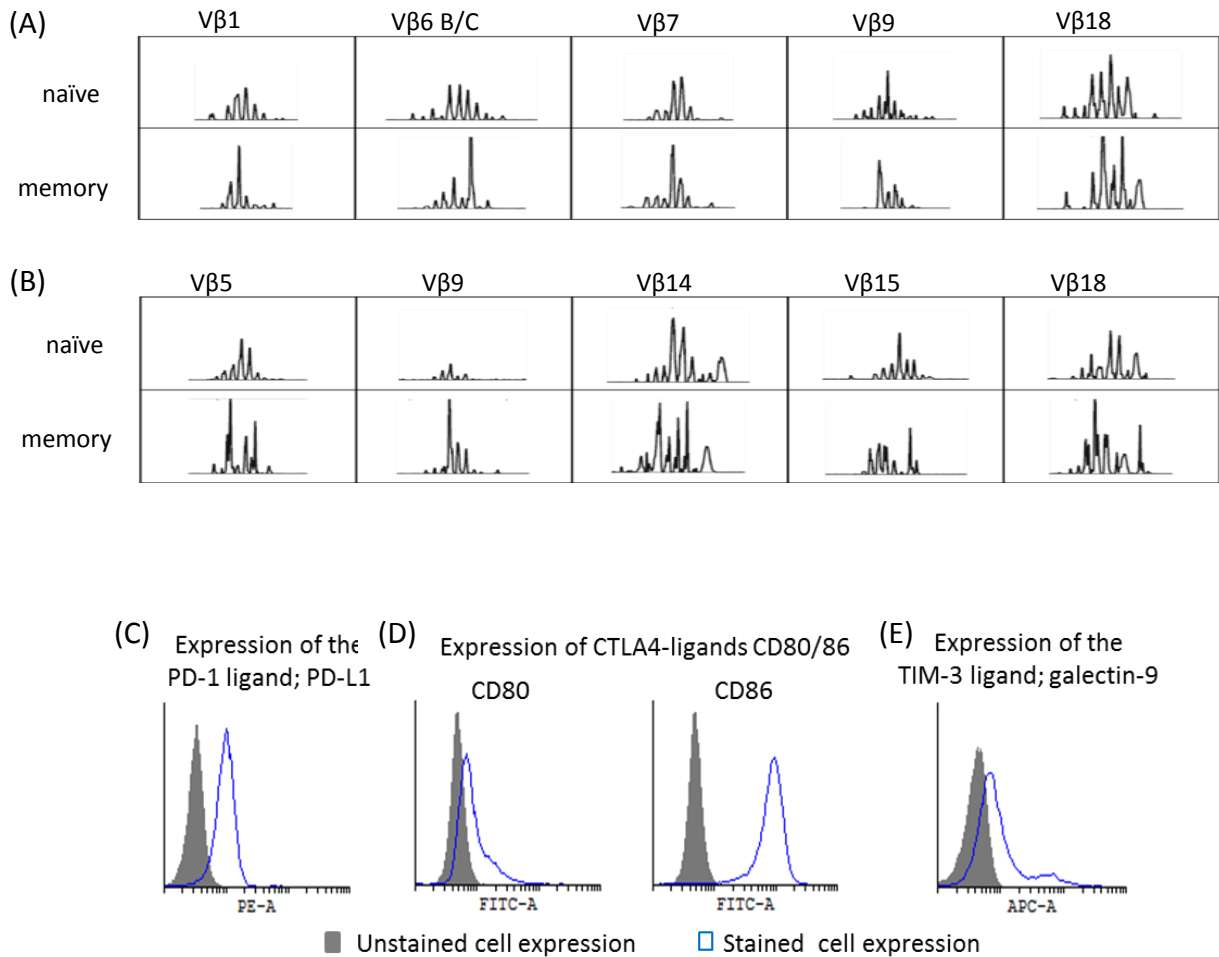

**Supplementary figure 1. Representative TCR V $\beta$  spectratyping profiles of T-cells from healthy donors and co-inhibitory receptor ligand expression on mature monocyte-derived DCs utilised during the *in vitro* antigen-stimulation of naïve and memory T-cells. (A, B) TCR V $\beta$  spectratyping profiles of T-cells from healthy donors (A) S2 and (B) S4 showing skewed CDR3 lengths distribution after *in vitro* priming of naïve T-cells to SMX-NO. The expression of (C) the PD-1-ligand PD-L1 (PD-L1-PE), (D) the CTLA4-ligands CD80 (CD80-FITC) and CD86 (CD86-FITC), and (E) the TIM-3-ligand galectin-9 (Gal-9-APC\*) on LPS- and TNF- $\alpha$ -matured DCs (Grey histogram, unstained cells; blue histogram, CD14<sup>+</sup> monocyte-derived mature DCs).**

**Supplementary table 1. Flow cytometric analysis of TCR V $\beta$  usage on naïve and SMX-NO specific memory T-cells.**

| TCR      | Day 0 - % naïve T-cells |       |       |       |       | Mean day0 <sup>1</sup><br>(excl. S1) | SD   | mean -3SD | mean<br>+3SD | Day 11-<br>% SMX-NO spec. memory T-cells |       |       |       |       |
|----------|-------------------------|-------|-------|-------|-------|--------------------------------------|------|-----------|--------------|------------------------------------------|-------|-------|-------|-------|
|          | S2                      | S3    | S4    | S5    | S6    |                                      |      |           |              | S2                                       | S3    | S4    | S5    | S6    |
| Vb 1     | 4.66                    | 3.96  | 4.28  | 3.69  | 3.76  | 4.07                                 | 0.40 | 2.87      | 5.27         | 3.17                                     | 1.28  | 1.82  | 1.93  | 5.59  |
| Vb 2     | 7.12                    | 8.49  | 6.65  | 7.29  | 5.34  | 6.98                                 | 1.14 | 3.56      | 10.40        | 18.12                                    | 0.88  | 0.62  | 1.30  | 9.89  |
| Vb 3     | 0.67                    | 0.43  | 10.64 | 4.60  | 6.39  | 4.55                                 | 4.26 | -8.23     | 17.32        | 1.24                                     | 0.57  | 6.81  | 3.57  | 4.11  |
| Vb 4     | 0.21                    | 0.07  | 0.09  | 0.53  | 0.03  | 0.19                                 | 0.20 | -0.42     | 0.80         | 2.85                                     | 3.27  | 3.37  | 5.24  | 3.92  |
| Vb 5.1   | 4.53                    | 8.54  | 6.82  | 6.88  | 4.44  | 6.24                                 | 1.75 | 1.00      | 11.48        | 5.34                                     | 0.86  | 0.41  | 0.30  | 3.32  |
| Vb 5.2   | 0.77                    | 0.80  | 0.33  | 0.61  | 0.91  | 0.68                                 | 0.23 | 0.01      | 1.36         | 0.73                                     | 10.65 | 7.88  | 12.22 | 1.00  |
| Vb 5.3   | 0.78                    | 0.26  | 0.21  | 0.40  | 0.77  | 0.48                                 | 0.27 | -0.34     | 1.31         | 1.16                                     | 3.88  | 4.25  | 2.88  | 0.82  |
| Vb 7.1   | 2.91                    | 1.95  | 1.04  | 2.59  | 1.62  | 2.02                                 | 0.75 | -0.22     | 4.27         | 5.36                                     | 0.70  | 0.73  | 1.12  | 1.64  |
| Vb 7.2   | 2.53                    | 0.60  | 0.06  | 0.35  | 0.03  | 0.71                                 | 1.04 | -2.41     | 3.84         | 3.11                                     | 1.98  | 1.00  | 1.47  | 0.00  |
| Vb 8     | 3.55                    | 1.76  | 2.34  | 1.92  | 3.52  | 2.62                                 | 0.86 | 0.03      | 5.21         | 3.72                                     | 5.00  | 3.89  | 3.30  | 3.74  |
| Vb 9     | 0.18                    | 0.22  | 0.15  | 0.15  | 0.07  | 0.15                                 | 0.06 | -0.01     | 0.32         | 3.84                                     | 3.45  | 4.47  | 6.85  | 2.27  |
| Vb 11    | 0.75                    | 0.87  | 0.77  | 0.73  | 0.58  | 0.74                                 | 0.10 | 0.43      | 1.05         | 1.18                                     | 4.69  | 5.66  | 2.92  | 0.65  |
| Vb 12    | 1.17                    | 1.64  | 1.32  | 1.22  | 0.68  | 1.21                                 | 0.35 | 0.17      | 2.24         | 1.52                                     | 1.78  | 2.32  | 1.61  | 1.10  |
| Vb 13.1  | 3.27                    | 4.27  | 2.84  | 3.27  | 3.57  | 3.44                                 | 0.53 | 1.85      | 5.03         | 4.62                                     | 3.35  | 2.81  | 3.66  | 5.03  |
| Vb 13.2  | 3.91                    | 2.34  | 0.97  | 1.73  | 0.60  | 1.91                                 | 1.31 | -2.01     | 5.83         | 3.92                                     | 0.49  | 0.57  | 0.51  | 0.42  |
| Vb 13.6  | 1.57                    | 1.62  | 1.29  | 1.79  | 1.61  | 1.58                                 | 0.18 | 1.03      | 2.12         | 1.45                                     | 6.02  | 2.75  | 2.93  | 2.59  |
| Vb 14    | 2.19                    | 0.89  | 2.47  | 0.85  | 0.89  | 1.46                                 | 0.80 | -0.95     | 3.86         | 6.05                                     | 4.83  | 6.59  | 5.44  | 3.70  |
| Vb 16    | 0.55                    | 0.86  | 0.75  | 0.82  | 1.09  | 0.81                                 | 0.20 | 0.23      | 1.40         | 0.38                                     | 1.37  | 0.69  | 1.15  | 0.62  |
| Vb 17    | 6.90                    | 3.45  | 6.20  | 6.44  | 4.68  | 5.53                                 | 1.43 | 1.24      | 9.83         | 8.00                                     | 1.64  | 1.91  | 1.06  | 4.97  |
| Vb 18    | 0.52                    | 0.11  | 0.17  | 0.12  | 0.39  | 0.26                                 | 0.18 | -0.29     | 0.81         | 0.49                                     | 10.40 | 7.89  | 8.05  | 1.02  |
| Vb 20    | 1.33                    | 2.18  | 0.96  | 2.14  | 1.43  | 1.61                                 | 0.53 | 0.01      | 3.21         | 2.68                                     | 2.35  | 0.67  | 1.93  | 2.25  |
| Vb 21.3  | 1.63                    | 2.54  | 2.67  | 2.46  | 1.82  | 2.22                                 | 0.47 | 0.82      | 3.62         | 1.72                                     | 1.55  | 1.69  | 1.93  | 1.70  |
| Vb 22    | 3.10                    | 3.47  | 4.02  | 1.79  | 4.00  | 3.28                                 | 0.92 | 0.53      | 6.02         | 1.88                                     | 1.14  | 1.56  | 0.65  | 3.87  |
| Vb 23    | 0.79                    | 0.67  | 0.29  | 0.57  | 1.30  | 0.72                                 | 0.37 | -0.39     | 1.84         | 0.54                                     | 5.65  | 0.37  | 4.21  | 0.85  |
| total Vb | 55.59                   | 51.95 | 57.33 | 52.95 | 49.52 |                                      |      |           |              | 83.08                                    | 77.79 | 70.72 | 76.23 | 65.09 |

<sup>1</sup> Donor 1 excluded from mean calculation

**Supplementary Table 2. Summary of the antigen-specific proliferation of SMX-NO-primed naive T-cells ± PD-L1/CTLA4/TIM-3 blocking antibodies.**

| Block <sup>1</sup><br>used | Donor<br>number | - block drug<br>Response<br>(CPM) | + block drug<br>Response<br>(CPM) | SI of comparative<br>response with addition<br>of block |
|----------------------------|-----------------|-----------------------------------|-----------------------------------|---------------------------------------------------------|
| PD-L1                      | Donor 1         | weak (3549.0)                     | good (15214.0)                    | ↑ 4.3 (p=0.002)                                         |
|                            | Donor 2         | weak (2543.3)                     | weak (12360.6)                    | ↑ 4.9 (p=0.038)                                         |
|                            | Donor 3         | weak (13318.3)                    | very strong (63258.3)             | ↑ 4.7 (p=0.012)                                         |
|                            | Donor 4         | weak (7689.0)                     | good (29107.6)                    | ↑ 3.8 (p=0.020)                                         |
|                            | Donor 5         | very strong (51009.6)             | good (29463.6)                    | No increase                                             |
| CTLA4                      | Donor 6         | weak (5475.3)                     | weak (9750.3)                     | ↑ 1.8 (p=0.043)                                         |
|                            | Donor 7         | good (19496.6)                    | strong (32843.3)                  | ↑ 1.7 (p=0.027)                                         |
|                            | Donor 8         | good (15668.3)                    | strong (36262.0)                  | ↑ 2.3 (p=0.023)                                         |
|                            | Donor 9         | weak (8050.0)                     | very strong (49669.3)             | ↑ 6.2 (p=0.006)                                         |
|                            | Donor 10        | very strong (50829.6)             | very strong (68964.3)             | ↑ 1.4 (p=0.017)                                         |
|                            | Donor 5         | good (19659.0)                    | strong (36279.6)                  | ↑ 1.8 (p=0.010)                                         |
|                            | Donor 11        | good (25933.6)                    | weak (14800.6)                    | No increase                                             |
|                            | Donor 12        | weak (8802.6)                     | weak (7135.6)                     | No increase                                             |
|                            | Donor 4         | strong (39129.3)                  | strong (38245.0)                  | No increase                                             |
| TIM-3                      | Donor 13        | very strong (50698.0)             | very strong (54427.0)             | No increase                                             |
|                            | Donor 14        | strong (43080.3)                  | good (23292.0)                    | No increase                                             |
|                            | Donor 5         | very strong (50357.3)             | strong (44196.0)                  | No increase                                             |

<sup>1</sup>Naive T-cells from healthy donors were cultured with mature autologous DCs in the presence of SMX-NO (50 µM) for one 1 week, ± PD-L1 (5 µg/ml) /CTLA4 (10 µg/ml) /TIM-3 (7.5 µg/ml) blocking antibodies before restimulation with fresh DCs and SMX-NO (20-50 µM). Strength of proliferative response was measured by [<sup>3</sup>H] thymidine incorporation and is shown as CPM above background; weak (< 15000), good (15000-30000), strong (30000-45000), very strong (> 45000). An enhanced response is shown by significant fold increase with block compared to without (\*p ≤ 0.05).

**Supplementary Table 3. Summary of the antigen-specific proliferation of SMX-NO-exposed memory T-cells  $\pm$  PD-L1/CTLA4/TIM-3 blocking antibodies.**

| Block used | Donor number | - block drug Response (CPM) | + block drug Response (CPM) | SI of comparative response with addition of block |
|------------|--------------|-----------------------------|-----------------------------|---------------------------------------------------|
| PD-L1      | Donor 15     | weak (13750.6)              | weak (8158.0)               | No increase                                       |
|            | Donor 5      | strong (32780.0)            | good (24932.3)              | No increase                                       |
|            | Donor 16     | weak (10167)                | weak (8338.6)               | No increase                                       |
| CTLA4      | Donor 5      | weak (14443.6)              | good (22310.3)              | $\uparrow$ 1.5 (p=0.022)                          |
|            | Donor 9      | weak (7470.3)               | weak (9981.6)               | $\uparrow$ 1.3 (p=0.009)                          |
|            | Donor 8      | weak (981.0)                | weak (5666.6)               | $\uparrow$ 6.6 (p=0.002)                          |
|            | Donor 11     | weak (8032.6)               | weak (6903.3)               | No increase                                       |
|            | Donor 6      | weak (8500.3)               | weak (5548.0)               | No increase                                       |
|            | Donor 10     | very strong (47951.3)       | good (29999.6)              | No increase                                       |
| TIM-3      | Donor 5      | strong (33874.0)            | strong (34144.3)            | No increase                                       |
|            | Donor 15     | weak (13750.6)              | good (19919.3)              | No increase                                       |
|            | Donor 13     | good (17515.3)              | weak (13202.3)              | No increase                                       |

<sup>1</sup>Memory T-cells from healthy donors were cultured with mature autologous DCs in the presence of SMX-NO (50  $\mu$ M) for one week,  $\pm$  PD-L1 (5  $\mu$ g/ml) /CTLA4 (10  $\mu$ g/ml) /TIM-3 (7.5  $\mu$ g/ml) blocking antibodies before restimulation with fresh DCs and SMX-NO (20-50  $\mu$ M). Strength of proliferative response was measured by [<sup>3</sup>H] thymidine incorporation and is shown as CPM above background; weak (< 15000), good (15000-30000), strong (30000-45000), very strong (> 45000). An enhanced response is shown by significant fold increase with block compared to without (\*p  $\leq$  0.05).
